# Supplementary material for: BMPER Improves Vascular Remodeling and the Contractile Vascular SMC Phenotype
Source: MDPI journal article supplement (doi:10.3390/ijms24054950), 2023-03-03
Supplement: s1 [file s1]

# Supplementary Materials

## Figures

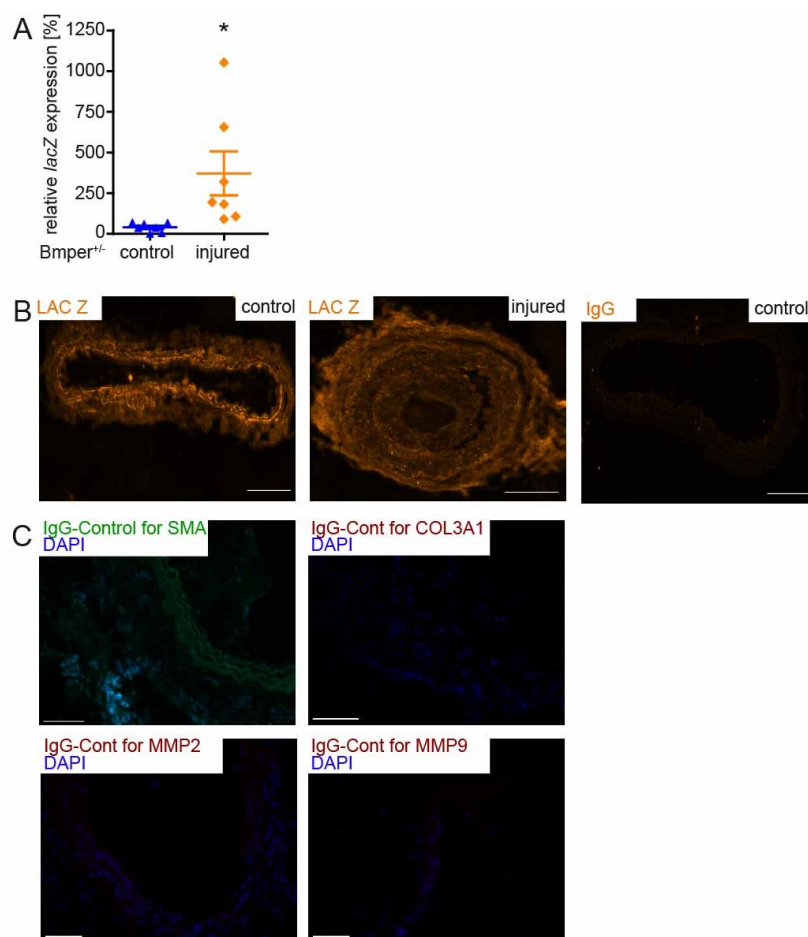

**Figure S1.** Mouse carotid artery ligation and cuff-induced neointimal formation model causes changes in bone morphogenetic protein-binding endothelial regulator (BMPER) promoter-driven *lacZ* expression. **A**, Quantitative real-time PCR analysis of *lacZ* mRNA expression levels 14 days after carotid injury in C57BL/6N\_ *Bmpert/+* mice. RNA polymerase II serves as internal control. Data represent mean values with SEM; n=7 per group; \*P=as indicated vs control. **B**, After 21 days right common carotid artery (RCCA) and left CCA (LCCA) were harvested and frozen in embedding media before cryosections were prepared. Representative micrographs of *Bmpert* promoter-driven LAC Z immunostaining (orange), and 4',6-diamidino-2-phenylindole (DAPI) to visualize nuclei (blue). Scale bar: 100  $\mu$ m. **C**, Representative pictures of IgG control staining for SMA, COL3A1, MMP2 and MMP corresponding to the main Figure 2 of the manuscript. Scale bar 50  $\mu$ m.

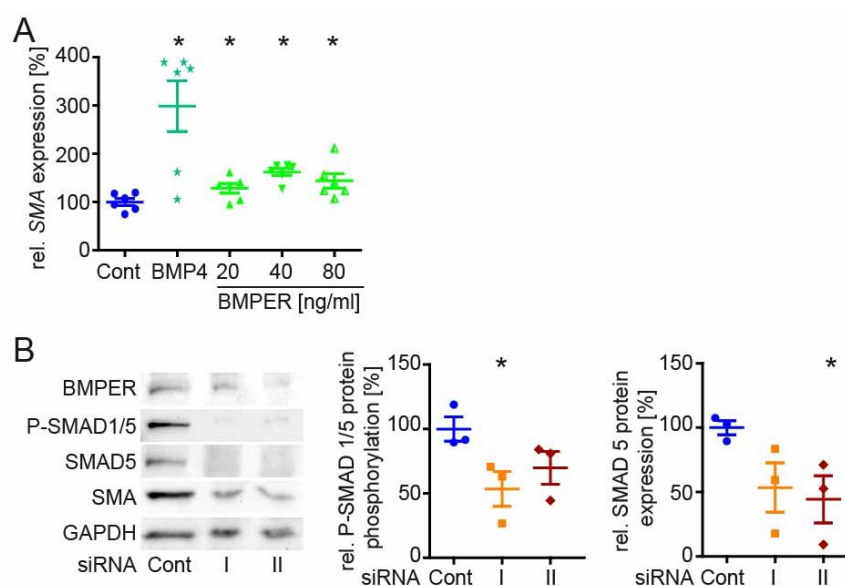

**Figure S2.** BMPER and classical BMP signaling pathway activation. **A**, After initial serum starvation in 0.4% EBM for 24 hours, vSMCs were stimulated with indicated recombinant proteins before expression analysis of SMA by qRT-PCR was performed. Human RNA polymerase II serves as internal control. Data are mean±SEM; n=6; \*P<0.048 vs control. **B**, Human vSMCs were silenced for BMPER with either of two specific small interfering RNAs (siRNAs; BI and BII) or transfected with control siRNA (Cont). Western blot analysis of BMPER, P-SMAD1/5, SMAD5, and SMA was performed 72 hours post siRNA transfection. Glyceraldehyde 3-phosphate dehydrogenase (GAPDH) serves as loading control. Data represent mean±SEM; n=3; \*P<0.048 vs control.

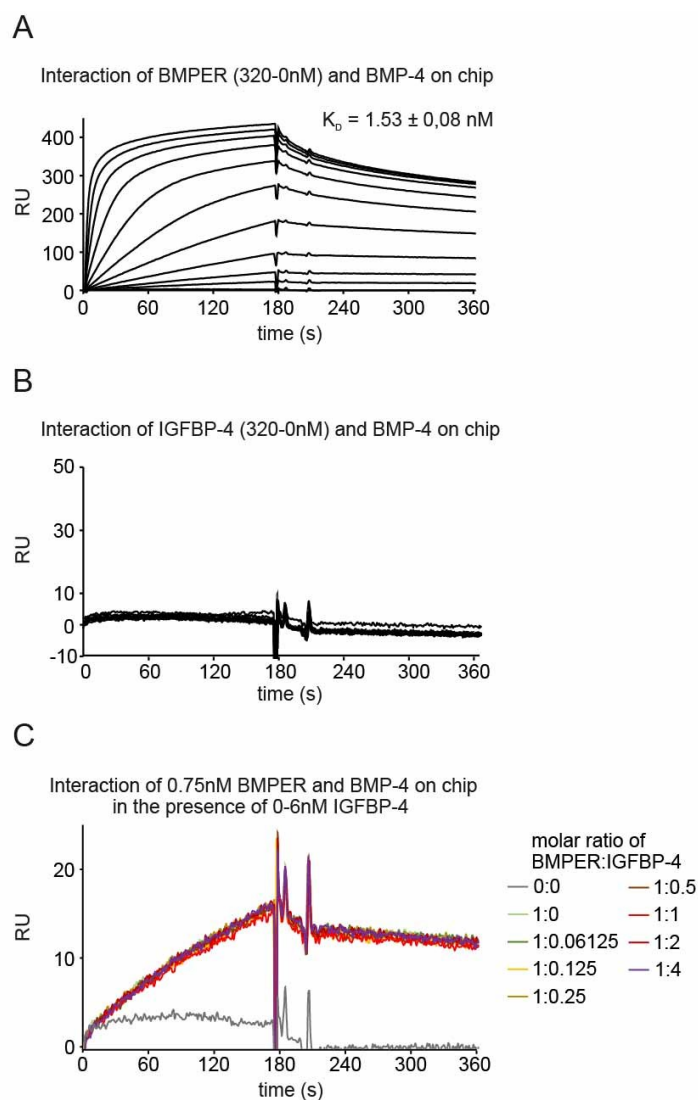

**Figure S3.** Surface plasmon resonance (SPR) analysis of BMPER, IGFBP4 and BMP4 interaction. **A**, Representative surface plasmon resonance (SPR) sensorgram showing the interaction of immobilized BMP4 with soluble BMPER ( $K_D$  of  $1.53 \pm 0.08 \text{ nM}$ ). 0 – 320 nM BMPER diluted in HBS-EP buffer was injected. **B**, Representative SPR sensorgram showing no interaction of immobilized BMP4 with soluble IGFBP4. 0 – 320 nM IGFBP4 diluted in HBS-EP buffer was injected. **C**, Competition assay. Representative SPR sensorgram showing the interaction of immobilized BMP4 with soluble BMPER (0.75 nM) and IGFBP4. 0 – 6 nM IGFBP4 diluted in HBS-EP buffer was injected. IGFBP-4 does not interfere with the BMPER-BMP-4 interaction.

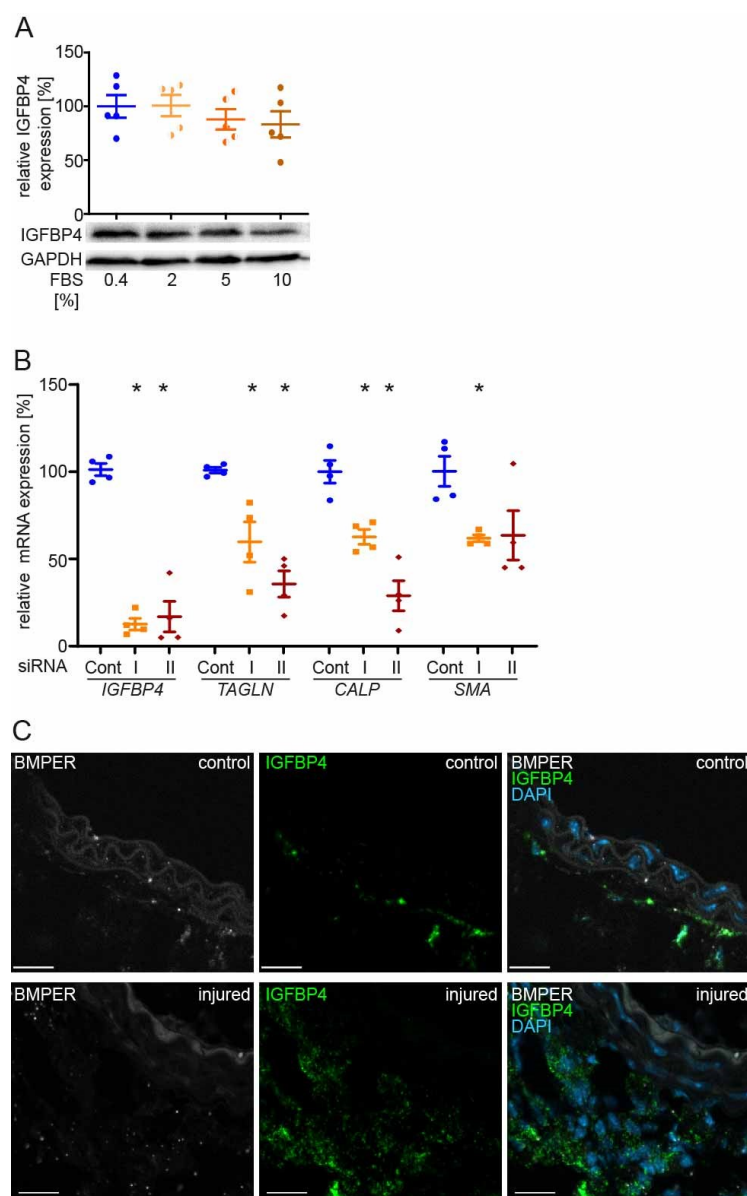

**Figure S4.** IGFBP4 regulation by serum, effect of IGFBP4 silencing on contractile vSMC markers and RNAscope *in situ* hybridisation for BMPER and IGFBP4 mRNA expression of sections from carotid artery. **A**, Western blot analysis of IGFBP4 protein expression was performed from vSMCs at 48 hours of stimulation with different FBS concentrations. GAPDH serves as loading control. Data represent mean±SEM; n=5. **B**, Human vSMCs were silenced for IGFBP4 with either of two specific small interfering RNAs (siRNAs; I and II) or transfected with control siRNA (Cont). Quantitative real-time PCR analysis of *IGFBP4*, *transgelin* (*TAGLN*), *calponin* (*CALP*), *SMA* and *myosin heavy chain 11* (*MYH11*) mRNA expression levels 72 hours post-transfection. Human RNA polymerase II serves as internal control. Data are mean±SEM; n=4; \**P*<0.0123 vs control. **C**, Representative micrographs of RNAscope *in situ* hybridization of *Bmper* (white) and *Igfbp4* (green) mRNA expression in untreated (top) and injured (bottom) carotid artery 14 days post operation. Nuclei are visualized by 4',6-diamidino-2-phenylindole (DAPI) (blue). Scale bar: 20 µm.

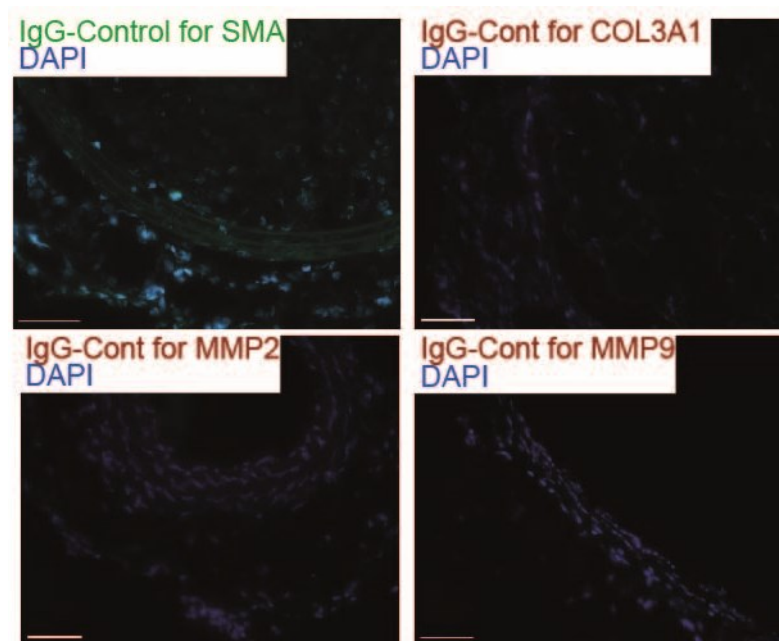

**Figure S5.** Representative pictures of cross-sections stained for the IgG controls for SMA (green), COL3A1 (red), MMP2 (red) and MMP9 (red) for the corresponding figure 7. DAPI staining to visualize the nuclei appears in blue. Scale bar: 50  $\mu$ m.

**Table S1.** Primer sequences, Taqman assays, siRNAs, antibodies.

| Primer       |                 |                               |                               |                          |
|--------------|-----------------|-------------------------------|-------------------------------|--------------------------|
| Gene         | Species         | Forward                       | Reverse                       |                          |
| Bmp4         | human           | 5'-CACGAAGAACATCTGGAGAAC-3'   | 5'-CCCTTGAGGTAACGATCAGCT-3'   |                          |
| Bmper        | human           | 5'- CTTGTGTTCTACGCCAGTGCC-3'  | 5'-GGACAGGAGAGAATGGGACAGAC-3' |                          |
| Bmper        | mouse           | 5'-GGTGTCTGTAACAGTGATGA-3'    | 5'-CAGTGCAGATAGGACAGCATC-3'   |                          |
| Calp         | human           | 5'-AGCTAAGAGAAGGGCGGAAC-3'    | 5'-CATCTGCAGGCTGACATTGA-3'    |                          |
| Col1a1       | mouse           | 5'-CTGGCGGTTTCAGGTCCAA-3'     | 5'-TTCCAGGCAATCCACGAG-3'      |                          |
| Col3a1       | mouse           | 5'-CAAGGGTGATCGTGGTGAAAA-3'   | 5'-CCAGGGAATCCTCGATGTCCT-3'   |                          |
| Fbn1         | mouse           | 5'-CATTCCTGTGGGGATGGATTC-3'   | 5'-TACGTGCAAGCACACCGATTT-3'   |                          |
| LacZ         | E.coli          | 5'-TATTGGCTTCATCCACCACA-3'    | 5'-TTGAAAATGGTCTGCTGCTG-3'    |                          |
| Myh11        | human           | 5'-CATCTACTCGGAGAAGATCGTCG-3' | 5'-CGCCTGTGCATAGAATGGACT-3'   |                          |
| Mmp2         | mouse           | 5'-GCTGGGAGCATGGCGATGGATAC-3' | 5'-GGAAGCGGAATGGAACTTC-3'     |                          |
| RpII         | human/<br>mouse | 5'-GCACCACGTCCAATGACAT-3'     | 5'-GTGCGGCTGCTTCCATAA-3'      |                          |
| Sma          | human           | 5'-GCGTGGCTATTCCTTCGTTA-3'    | 5'-ATGAAGGATGGCTGGAACAG-3'    |                          |
| Sma          | mouse           | 5'-CCCAGACATCAGGGAGTAATG-3'   | 5'-TCTATCGGATACTTCAGCGTC-3'   |                          |
| Tagln        | human           | 5'-AACAGCCTGTACCCTGATGG-3'    | 5'-CGGTAGTGCCCATCATTCTT-3'    |                          |
|              |                 |                               |                               |                          |
| siRNA        |                 |                               |                               |                          |
| Gene         | Species         | Forward                       | Reverse                       |                          |
| Bmper_1      | human           | 5'-GCACCUUAGUCACAUACCCTT-3'   | 5'-GGGUAUGUGACUAAGGUGCTG-3'   |                          |
| Bmper_2      | human           | 5'-GCUGCCUCUUUCGAAGUGATT-3'   | 5'-UCACUUCGAAAGAGGCAGCTC-3'   |                          |
|              |                 |                               |                               |                          |
| TaqMan Assay |                 |                               |                               |                          |
| Assay name   |                 | Assay ID                      | Cat. No.                      | Company                  |
| Mm_Mmp9      |                 | Mm00442991_m1                 | 4331182                       | Thermo Fisher Scientific |
| Mm Actb      |                 | Mm00607939_s1                 | 4352933E                      | Thermo Fisher Scientific |

| Recombinant Proteins |         |          |             |
|----------------------|---------|----------|-------------|
| Protein              | Species | Cat. No. | Company     |
| BMP4                 | human   | 314-BP   | R&D Systems |
| BMPER                | human   | 1956-CV  | R&D Systems |
| Bmper                | mouse   | 2299-CV  | R&D Systems |
| Chordin              | mouse   | 758-CN   | R&D Systems |
| IGF-1                | human   | 291-G1   | R&D Systems |
| IGFBP-4              | human   | 804-GB   | R&D Systems |
| Noggin               | human   | 6057-NG  | R&D Systems |
| PAPP-A               | human   | 2487-ZNF | R&D Systems |
| PDGF                 | human   | 220-BB   | R&D Systems |
| TGFβ1                | human   | 240-B    | R&D Systems |

| Primary antibodies     |              |            |             |                          |         |
|------------------------|--------------|------------|-------------|--------------------------|---------|
| Against                | Host species | Clone ID   | Cat. No.    | Company                  | (label) |
| Bmper                  | rabbit       | polyclonal | ab739000    | Abcam                    |         |
| Bmper                  | rat          | #355304    | MAB1956     | R&D Systems              |         |
| β-galactosidase (LacZ) | chicken      | polyclonal | Ab9361      | Abcam                    |         |
| Col3a1                 | rabbit       | polyclonal | Ab7778      | Abcam                    |         |
| Igfbp4                 | rabbit       | polyclonal | Sc-13092    | Santa Cruz               |         |
| Myh11                  | rabbit       | monoclonal | Ab124679    | Abcam                    |         |
| c-myc                  | mouse        | 9E10.3     | DLN-07722   | Dianova                  |         |
| αSMA                   | mouse        | 1A4        | A5228       | Sigma-Aldrich            |         |
| αSMA                   | mouse        | 1A4        | F3777       | Sigma-Aldrich            | FITC    |
| αSMA                   | mouse        | 1A4        | C6198       | Sigma-Aldrich            | Cy3     |
| V5                     | mouse        | monoclonal | R960-25     | Thermo Fisher Scientific |         |
| Mmp2                   | rabbit       | polyclonal | ab97779     | Abcam                    |         |
| Mmp9                   | rabbit       | polyclonal | ab38898     | Abcam                    |         |
| Gapdh                  | rabbit       | polyclonal | E1C604-1    | EnoGene                  |         |
| Vimentin               | rabbit       | D21H3      | 5741        | Cell Signaling           |         |
| IgG control            | rabbit       | polyclonal | X0936       | DakoCytomation           |         |
| IgG control            | rat          | IgG2a      | 553930      | BD Pharmingen            | PE      |
| IgG control            | mouse        | IgG2a      | 553929      | BD Pharmingen            | FITC    |
| IgG control            | chicken      | polyclonal | 003-000-003 | Jackson                  |         |

#### Secondary antibodies

| Against       | Host species | Clone ID   | Cat. No.  | Company                           | (label)         |
|---------------|--------------|------------|-----------|-----------------------------------|-----------------|
| rabbit        | donkey       | polyclonal | A-31572   | Thermo Fisher Scientific          | AlexaFluor555   |
| chicken       | goat         | polyclonal | A-11039   | Thermo Fisher Scientific          | Alexa488        |
| Mouse         | donkey       | polyclonal | A90-137D2 | Bethyl                            | Dylight488      |
| rat           | goat         | polyclonal | A-21434   | Thermo Fisher Scientific          | Alexa Fluor 555 |
| Plasmids      | Host species | Tag        |           | Source                            |                 |
| pcDNA3        | N/A          | N/A        |           | Invitrogen, Karlsruhe, Germany    |                 |
| pcDNA3_hBMPER | human        | N/A        |           | Jennifer Esser, Freiburg, Germany |                 |
| pcDNA4        | N/A          | V5, 6xHis  |           | Invitrogen, Karlsruhe, Germany    |                 |

---

|                  |       |            |                                                 |
|------------------|-------|------------|-------------------------------------------------|
| pcDNA4_mIgfbp4   | mouse | V5, 6xHis  | Dr. Ichiro Shiojima, Chiba University,<br>Japan |
| pSecTag2A        | N/A   | Myc, 6xHis | Invitrogen, Karlsruhe, Germany                  |
| pSecTag2A_mBMPER | mouse | Myc, 6xHis | Martin Moser, Freiburg, Germany                 |

---
